# Supplementary material for: Quarternization of 3-azido-1-propyne oligomers obtained by copper(I)-catalyzed azide–alkyne cycloaddition polymerization
Source: publisher site journal article supplement (doi:10.3762/bjoc.11.116), 2015-06-18
Supplement: Additional file 1 [file 1860-5397-11-116-S1.pdf]

## Supporting Information

for

# Quarternization of 3-azido-1-propyne oligomers obtained by copper(I)-catalyzed azide–alkyne cycloaddition polymerization

Shun Nakano, Akihito Hashidzume\*, and Takahiro Sato

Address: Department of Macromolecular Science, Graduate School of Science, Osaka  
University, 1-1 Machikaneyama-cho, Toyonaka, Osaka 560-0043, Japan

Email: Akihito Hashidzume - akihito@chem.sci.osaka-u.ac.jp

\*Corresponding author

## Estimation of the apparent self-diffusion coefficient for the oligomer quarternized

Figure 2a shows a typical example of the logarithm of the ratio of the observed spin echo intensities with and without field gradients ( $\ln[I(g)/I(0)]$ ) as a function of  $\gamma^2 g^2 \delta^2 (\Delta - \delta/3 - \tau/2)$  for oligoAPMe, where  $\gamma$  is the gyromagnetic ratio,  $g$  the gradient strength,  $\Delta$  the delay between the midpoints of the gradients,  $\delta$  the gradient length, and  $\tau$  the 90°–180° pulse distance. From the slopes of the straight lines and the Sterjkal equation [1-3]

$$\ln[I(g)/I(0)] = -\gamma^2 g^2 \delta^2 (\Delta - \delta/3 - \tau/2) D \quad (\text{S1})$$

the apparent self-diffusion coefficients ( $D$ ) were determined.

## References

1. Stejskal, E. O.; Tanner, J. E. *J. Chem. Phys.* **1965**, *42*, 288-292.
2. Tanner, J. E.; Stejskal, E. O. *J. Chem. Phys.* **1968**, *49*, 1768-1777.
3. Stilbs, P. *Prog. Nucl. Magn. Reson. Spectrosc.* **1987**, *19*, 1-45.
